# Supplementary material for: Synthesis, Characterization, Thermochromism, and Photochromism of Aromatic Aldehyde Hydrazone Derivatives
Source: Hindawi journal article supplement (doi:10.1155/2016/8460462), 2016-01-01
Supplement: f1 [file 8460462.f1.docx]

For correspondence

Contact Information: Telephone/ Mobile numbers: +86-13861292981

**E-mail:** zhushaoping18@163.com

**Figure captions**

**Figure S1.** MS Spectra of N-(5-phenylthiazole-2-yl)-2-hydroxylnaphthaldehydehydrazone ([M+H] +)

**Figure S1’.** MS Spectra of N-(5-phenylthiazole-2-yl)-2-hydroxylnaphthaldehydehydrazone ([M+Na] +)

**Figure S1’’.** MS Spectra of N-(5-phenylthiazole-2-yl)-2-hydroxylnaphthaldehydehydrazone ([M-H] +)

**Figure S2. 1**H NMR Spectra of N-(5-phenylthiazole-2-yl)-2-hydroxylnaphthaldehydehydrazone

**Figure S3.13**C NMR Spectra of N-(5-phenylthiazole-2-yl)-2-hydroxylnaphthaldehydehydrazone

**Figure S3’.13**C NMR Spectra of N-(5-phenylthiazole-2-yl)-2-hydroxylnaphthaldehydehydrazone (doublet)

**Figure S4.** MS Spectra of N-(4’-chloro-5-phenylthiazole-2-yl)-2- hydroxylnaphthaldehydehydrazone ([M+H]+)

**Figure S4’.** MS Spectra of N-(4’-chloro-5-phenylthiazole-2-yl)-2- hydroxylnaphthaldehydehydrazone ([M-H]+)

**Figure S4’’.** MS Spectra of N-(4’-chloro-5-phenylthiazole-2-yl)-2-

hydroxylnaphthaldehydehydrazone ([M+Na]+)

**Figure S5. 1**H NMR Spectra of N-(4’-chloro-5-phenylthiazole-2-yl)-2- hydroxylnaphthaldehydehydrazone

**Figure S6.** 13C NMR Spectra of N-(4’-chloro-5-phenylthiazole-2-yl)-2- hydroxylnaphthaldehydehydrazone

**Figure S7.** MS Spectra of N-(4’-nitro-5-phenylthiazole-2-yl)-2- hydroxylnaphthaldehydehydrazone ([M+H]+)

**Figure S7’.** MS Spectra of

N-(4’-nitro-5-phenylthiazole-2-yl)-2-hydroxylnaphthaldehydehydrazone ([M-H]+)

**Figure S7’’.** MS Spectra of

N-(4’-nitro-5-phenylthiazole-2-yl)-2-hydroxylnaphthaldehydehydrazone ([M+Na]+)

**Figure S8. 1**H NMR Spectra of N-(4’-nitro-5-phenylthiazole-2-yl)-2- hydroxylnaphthaldehydehydrazone

**Figure S9.** 13C NMR Spectra of N-(4’-nitro-5-phenylthiazole-2-yl)-2- hydroxylnaphthaldehydehydrazone


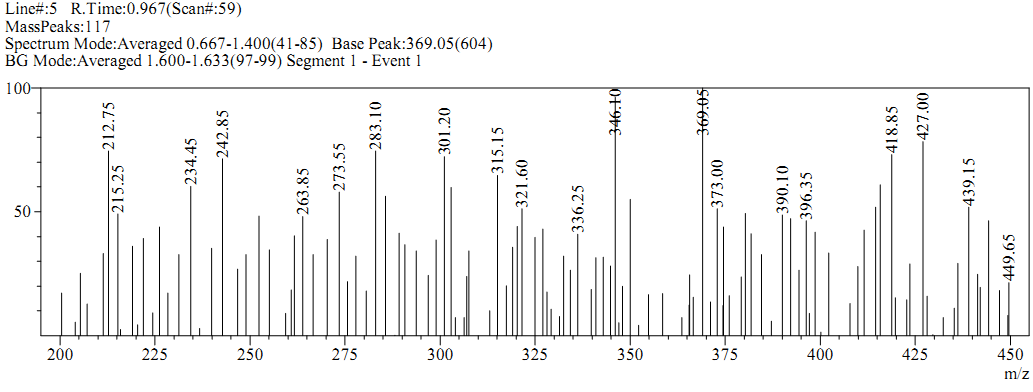


**Figure S1**. MS Spectra of

N-(5-phenylthiazole-2-yl)-2-hydroxylnaphthaldehydehydrazone ([M+H] +)


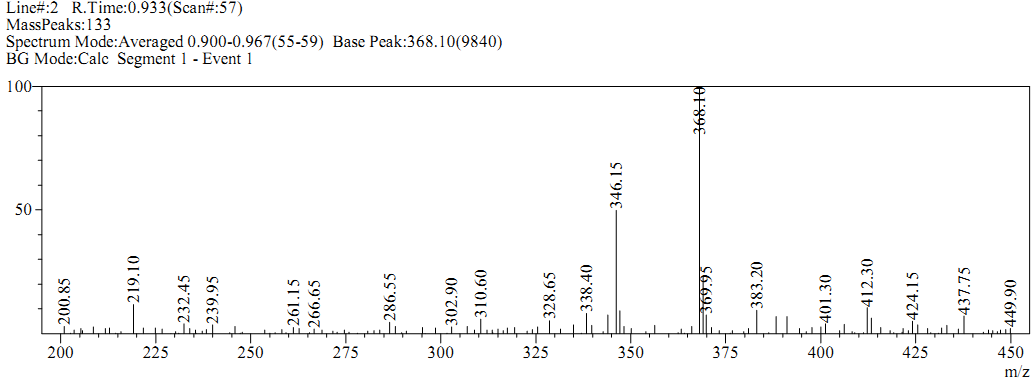


**Figure S1’**. MS Spectra of

N-(5-phenylthiazole-2-yl)-2-hydroxylnaphthaldehydehydrazone ([M+Na] +)


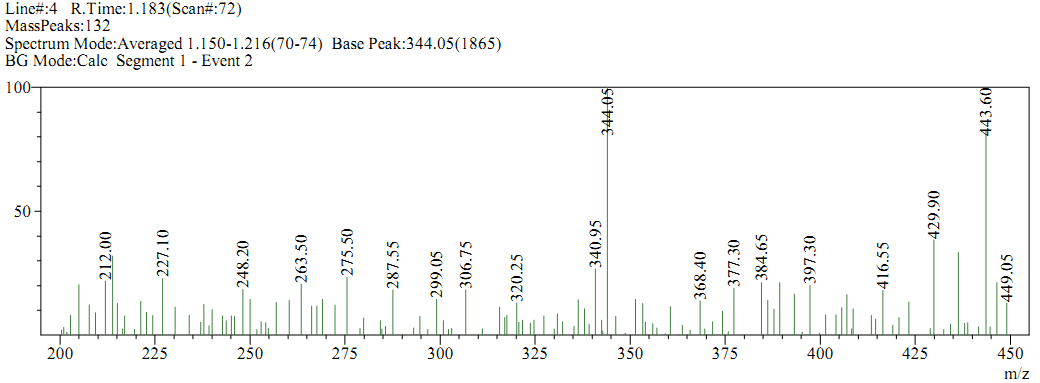


**Figure S1’’**. MS Spectra of

N-(5-phenylthiazole-2-yl)-2-hydroxylnaphthaldehydehydrazone ([M-H] +)


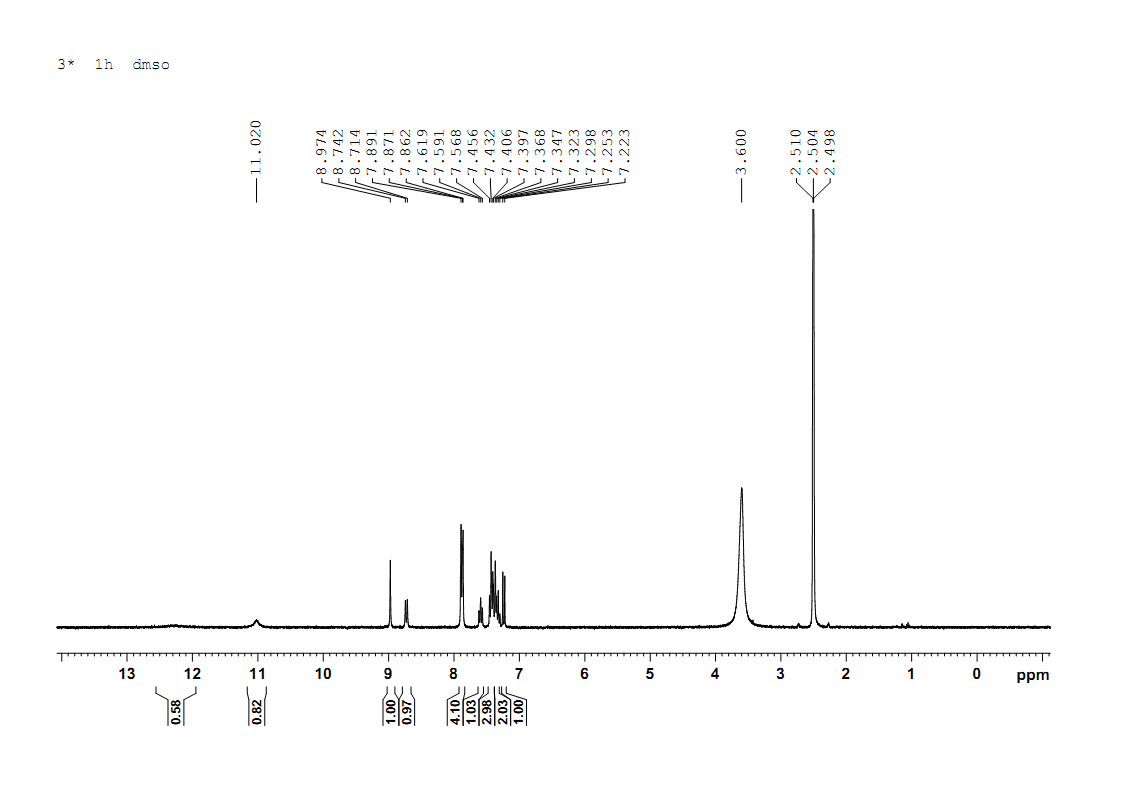


**Figure S2**.**1**H NMR Spectra of N-(5-phenylthiazole-2-yl)-2-hydroxylnaphthaldehydehydrazone


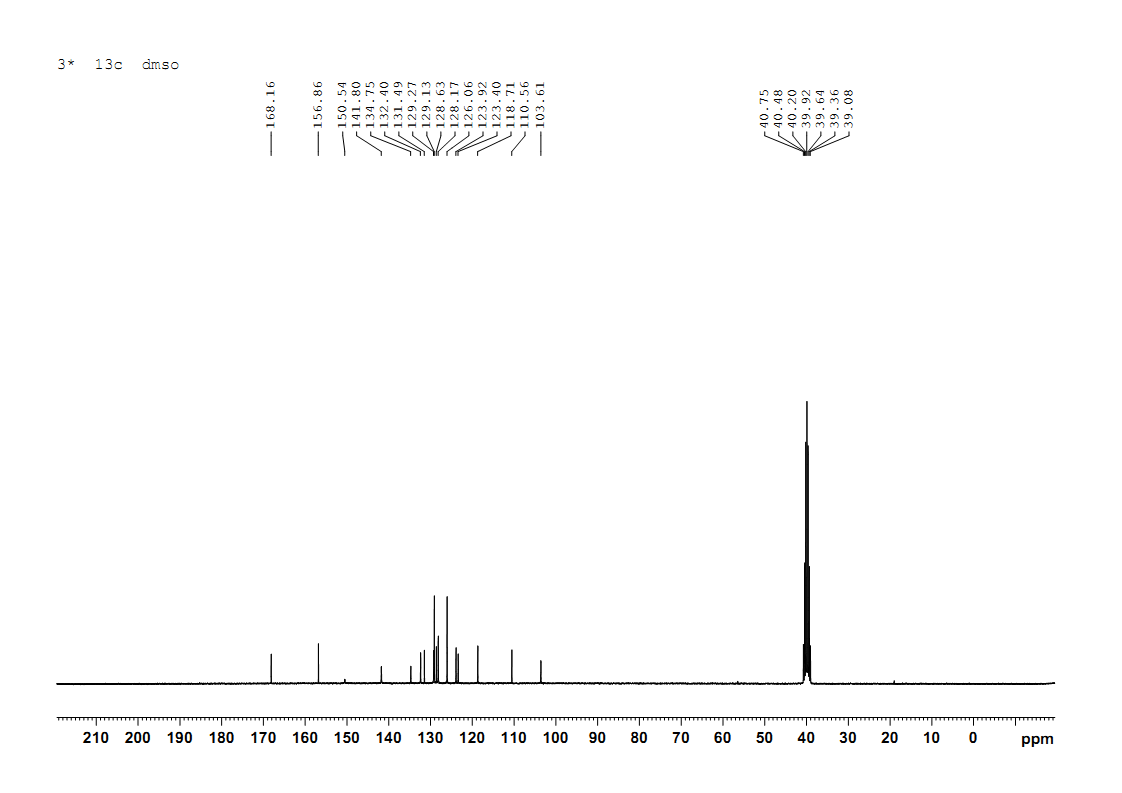


**Figure S3.13**C NMR Spectra of N-(5-phenylthiazole-2-yl)-2-hydroxylnaphthaldehydehydrazone


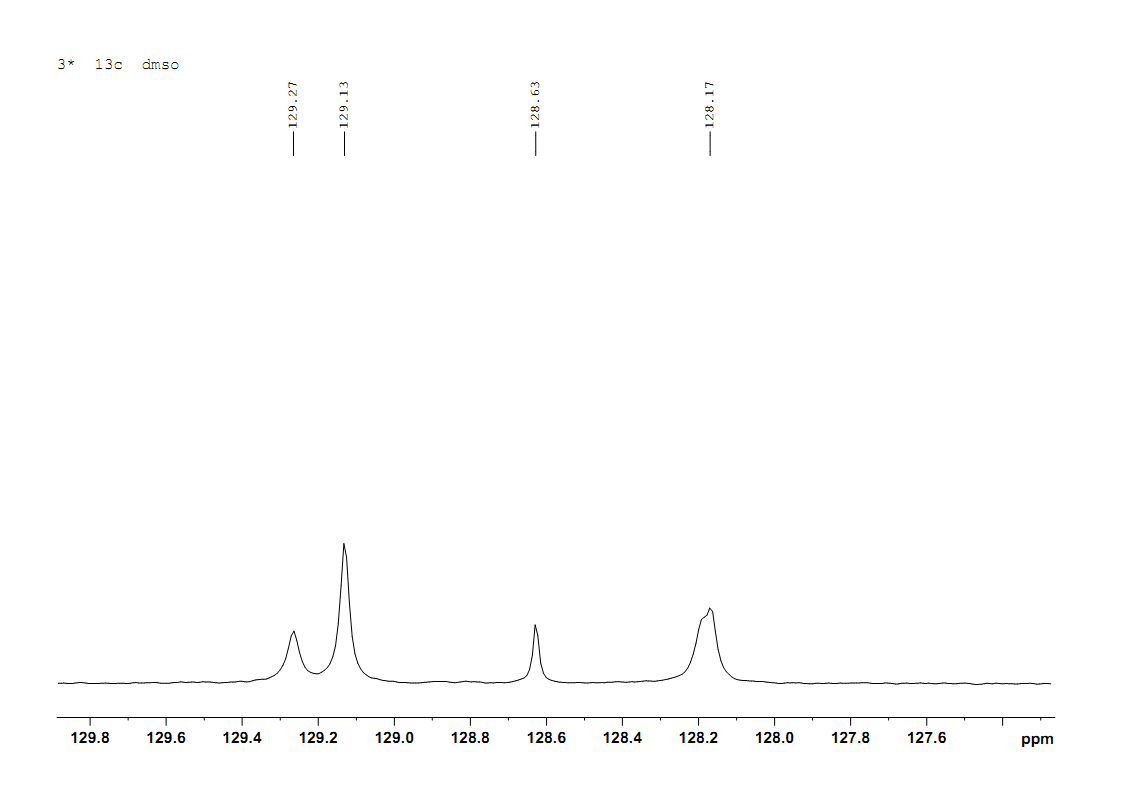


**Figure S3’.13**C NMR Spectra of N-(5-phenylthiazole-2-yl)-2-hydroxylnaphthaldehydehydrazone (doublet)


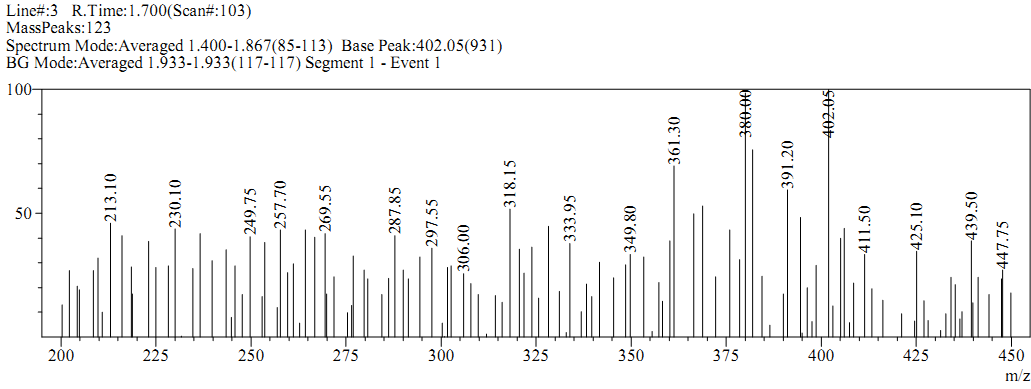


**Figure S4.** MS Spectra of

N-(4’-chloro-5-phenylthiazole-2-yl)-2- hydroxylnaphthaldehydehydrazone ([M+H]+)


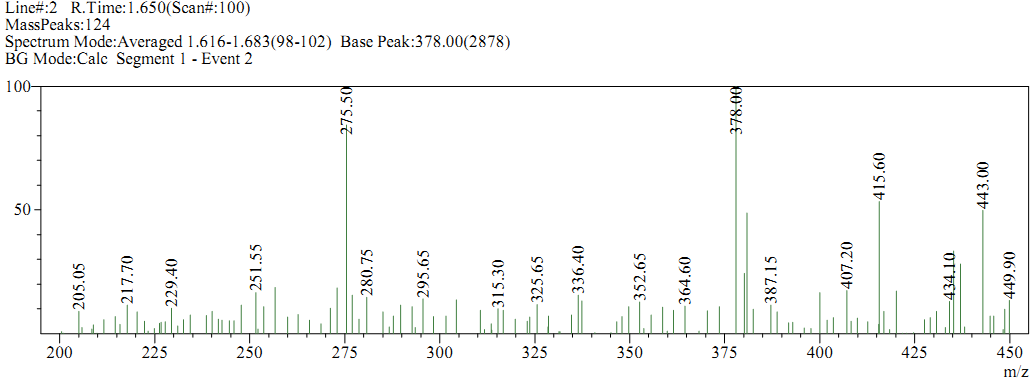


**Figure S4’.** MS Spectra of

N-(4’-chloro-5-phenylthiazole-2-yl)-2-hydroxylnaphthaldehydehydrazone ([M-H]+)


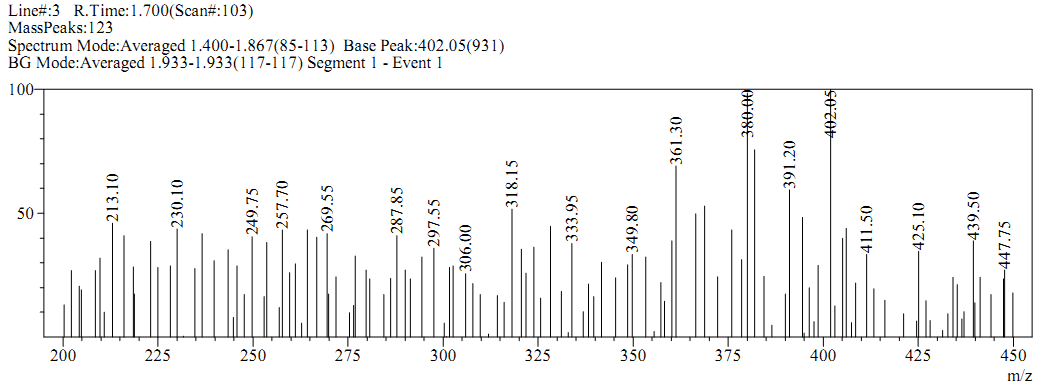


**Figure S4’’.** MS Spectra of

N-(4’-chloro-5-phenylthiazole-2-yl)-2- hydroxylnaphthaldehydehydrazone ([M+Na]+)


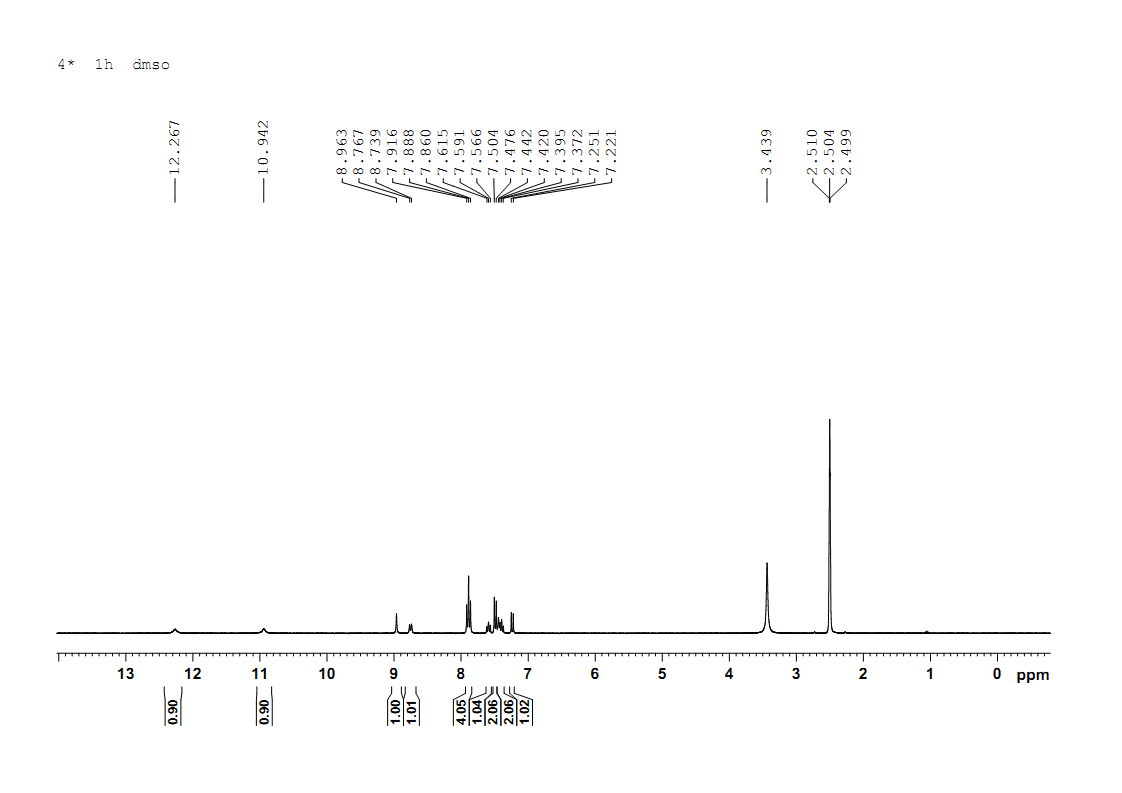


**Figure S5. 1**H NMR Spectra of N-(4’-chloro-5-phenylthiazole-2-yl)-2- hydroxylnaphthaldehydehydrazone


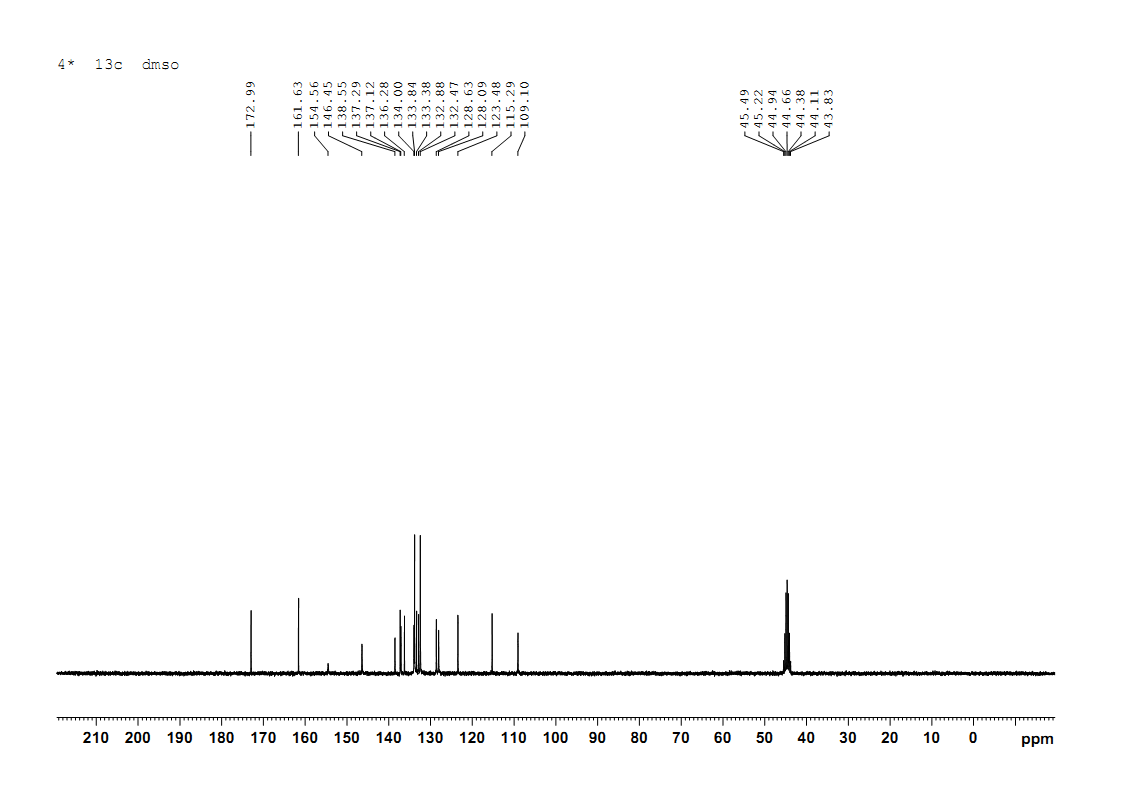


**Figure S6. 13**C NMR Spectra of N-(4’-chloro-5-phenylthiazole-2-yl)-2- hydroxylnaphthaldehydehydrazone


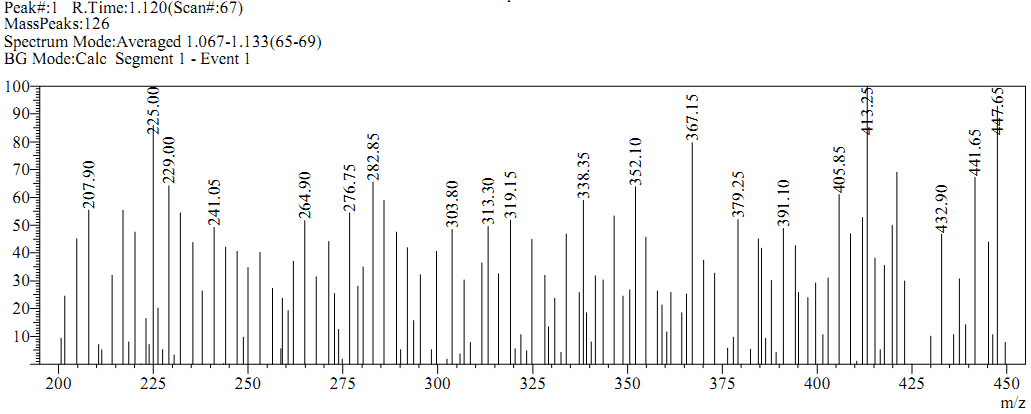


**Figure S7.** MS Spectra of

N-(4’-nitro-5-phenylthiazole-2-yl)-2-hydroxylnaphthaldehydehydrazone ([M+H]+)


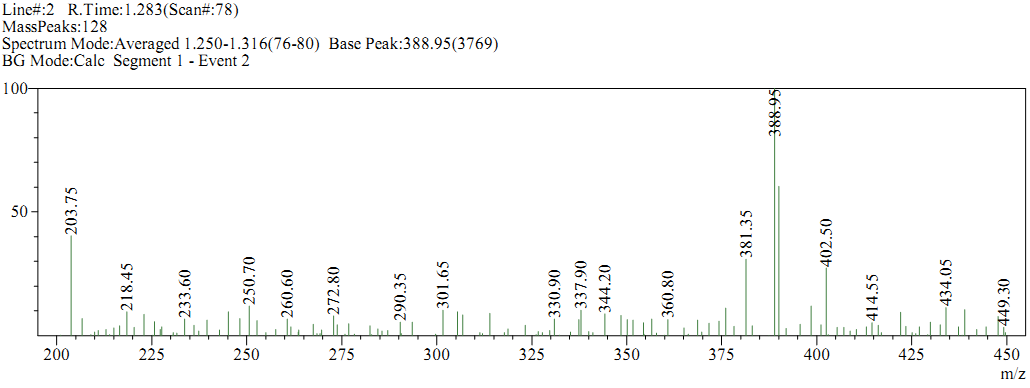


**Figure S7’.** MS Spectra of

N-(4’-nitro-5-phenylthiazole-2-yl)-2-hydroxylnaphthaldehydehydrazone ([M-H]+)


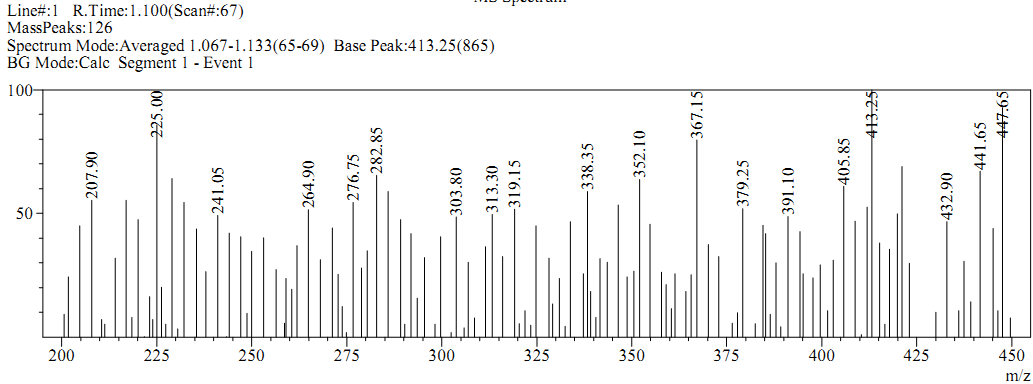


**Figure S7’’.** MS Spectra of

N-(4’-nitro-5-phenylthiazole-2-yl)-2-hydroxylnaphthaldehydehydrazone ([M+Na]+)


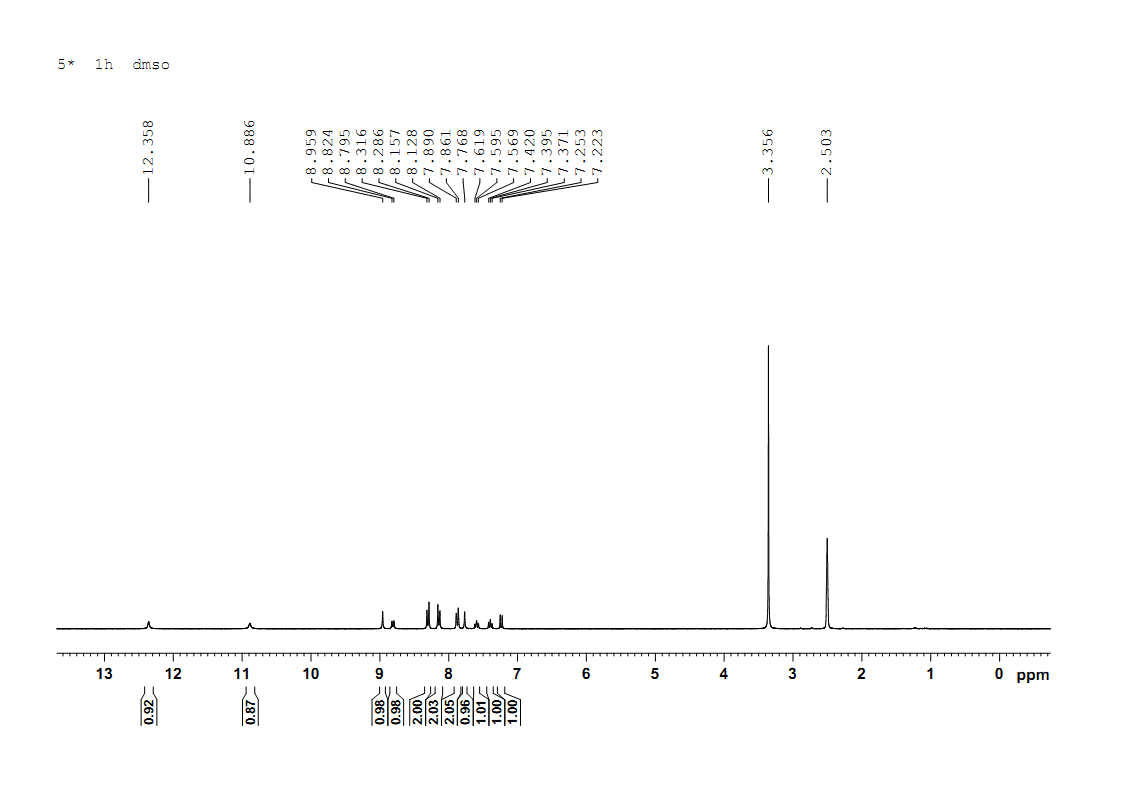


**Figure S8.** 1H NMR Spectra of

N-(4’-nitro-5-phenylthiazole-2-yl)-2-hydroxylnaphthaldehydehydrazone


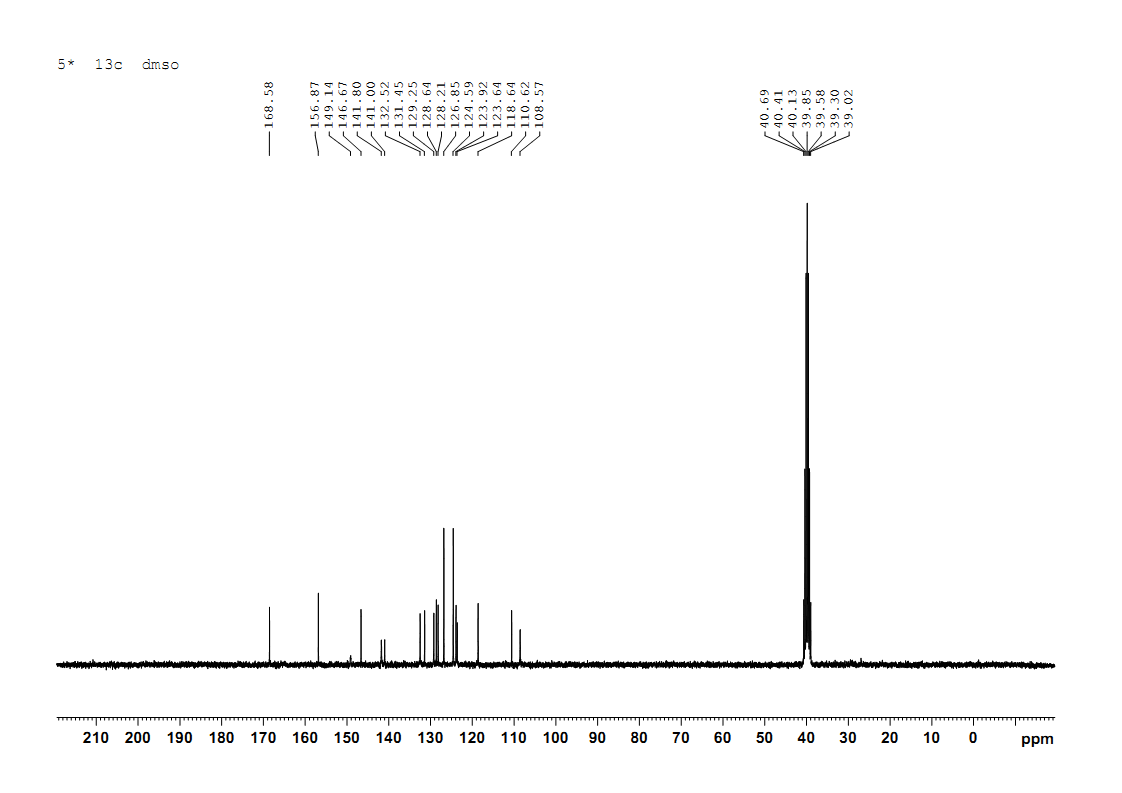


**Figure S9.** 13C NMR Spectra of

N-(4’-nitro-5-phenylthiazole-2-yl)-2-hydroxylnaphthaldehydehydrazone
